# Supplementary material for: Non-volatile control of topological phase transition in an asymmetric ferroelectric In2Te2S monolayer
Source: Royal Society of Chemistry journal article supplement (doi:10.1039/d3cp02616g), 2023-01-01
Supplement: d3cp02616g1.pdf [file d3cp02616g1.pdf]

**Supplemental Material for “Non-volatile control of topological phase transition in an asymmetric ferroelectric  $\text{In}_2\text{Te}_2\text{S}$  monolayer”**

Guang Song,<sup>1,\*</sup> Yangyang Wu,<sup>1</sup> Lei Cao,<sup>1</sup> Guannan Li,<sup>1</sup> Bingwen Zhang,<sup>2</sup> Feng Liang,<sup>1</sup> and Benling Gao<sup>1</sup>

<sup>1</sup>*Department of Physics, Huaiyin Institute of Technology, Huaian 223003, China*

<sup>2</sup>*Fujian Key Laboratory of Functional Marine Sensing Materials, Minjiang University, Fuzhou 350108, China*

\* Corresponding author: Guang Song, [gsong@hyit.edu.cn](mailto:gsong@hyit.edu.cn);

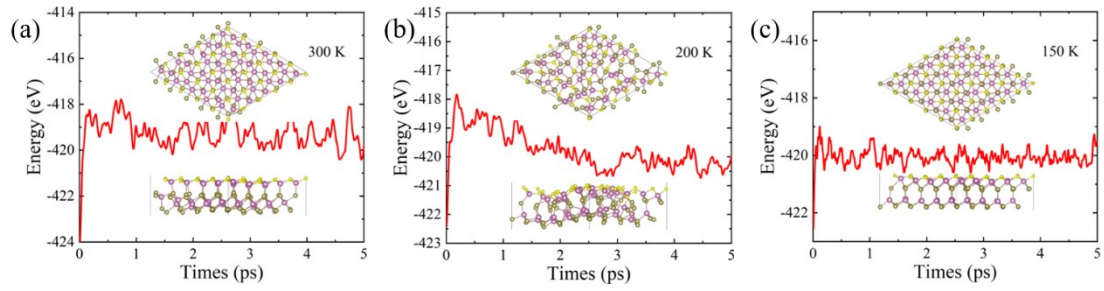

Fig. S1. (a) Snapshots of the atomic configuration at 5 ps and total energy fluctuations for (a) In<sub>2</sub>Te<sub>2</sub>S monolayer under P (↑) state at 300 K (b) In<sub>2</sub>Te<sub>2</sub>S monolayer under P (↓) state at 200 K, (c) In<sub>2</sub>Te<sub>2</sub>S monolayer under P (↓) state at 150 K.

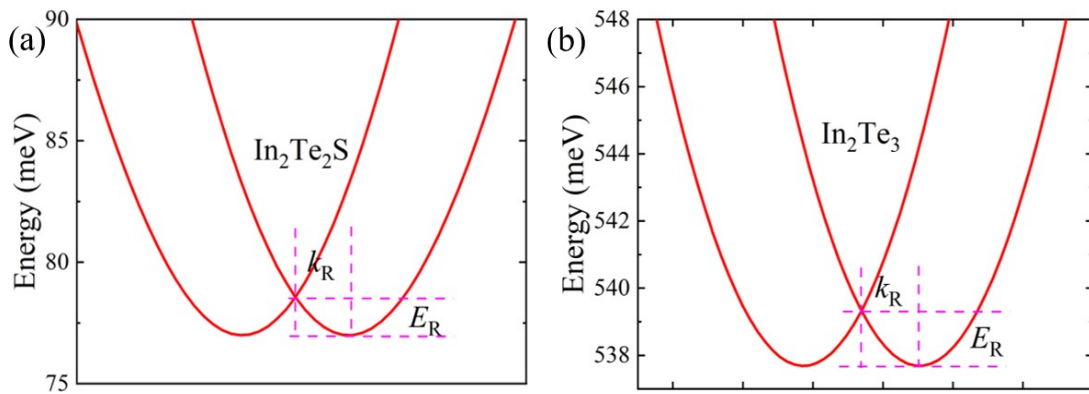

Fig. S2. The Rashba splitting for In<sub>2</sub>Te<sub>2</sub>S and In<sub>2</sub>Te<sub>3</sub> monolayers.

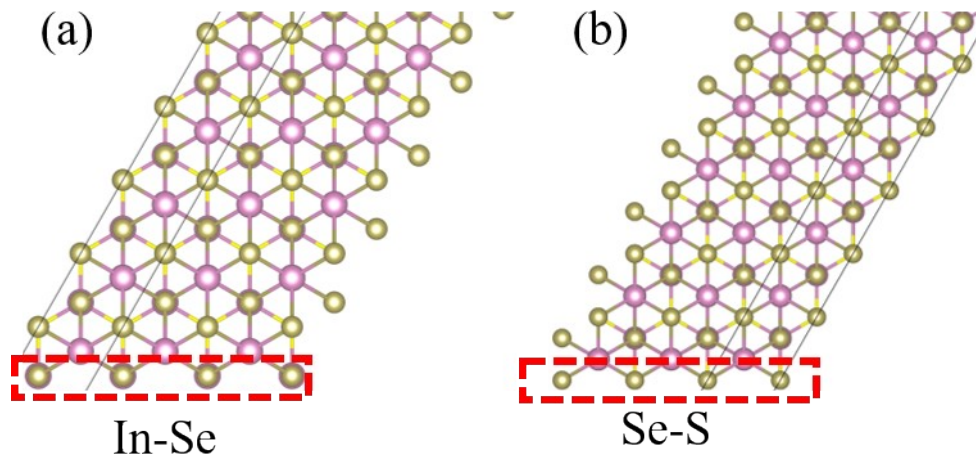

Fig. S3. The crystal structure of different terminal.

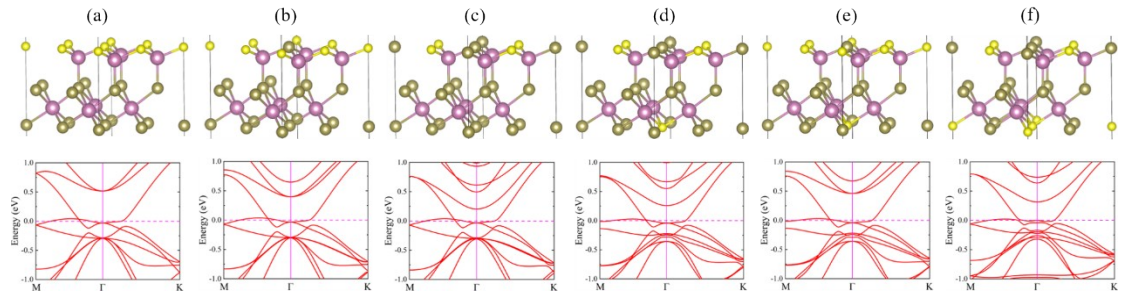

Fig. S4. The calculated band structures for the mixed structure.

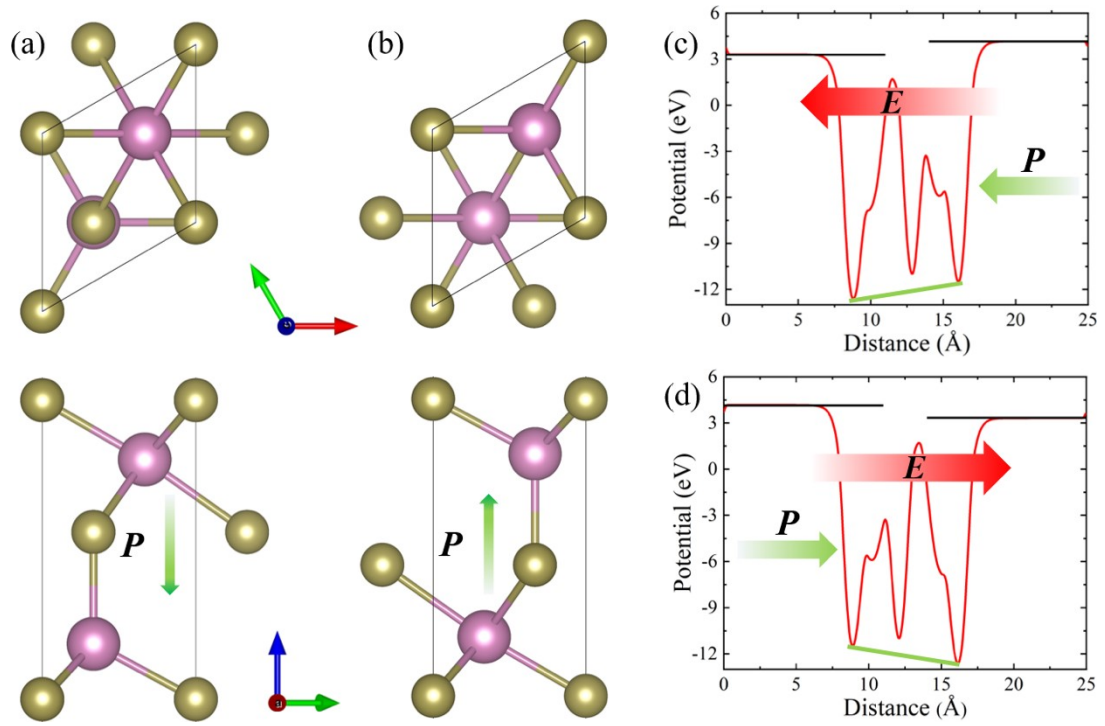

Fig. S5. Crystal structure of  $\text{In}_2\text{Te}_3$  monolayer under  $P\downarrow$  (a) and  $P\uparrow$  (b). Plane-averaged potential of  $\text{In}_2\text{Te}_3$  monolayer along its normal,  $z$ . (c)  $P\downarrow$ . (d)  $P\uparrow$ .

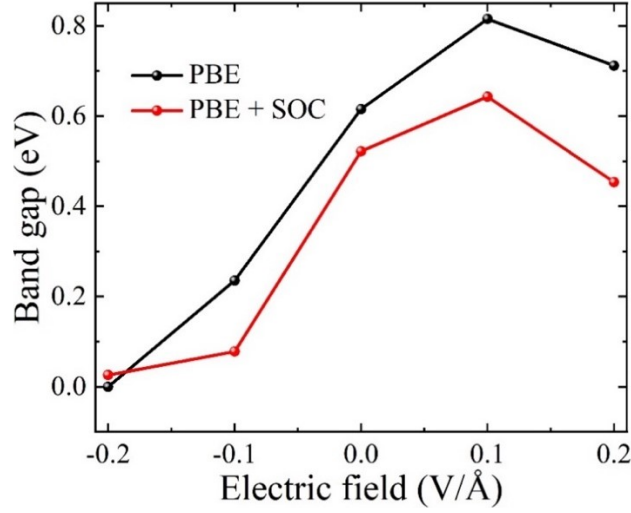

Fig. S6. The calculated band gap as a functional of external electric field for  $\text{In}_2\text{Te}_3$  monolayer.

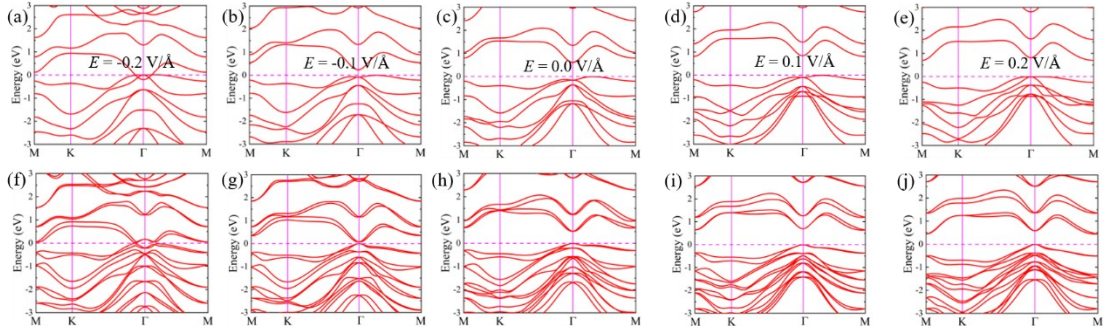

Fig. S7. The calculated band structure as a functional of external electric field for  $\text{In}_2\text{Te}_3$  monolayer. (a)-(e) PBE method without SOC. (f)-(j) PBE method with SOC

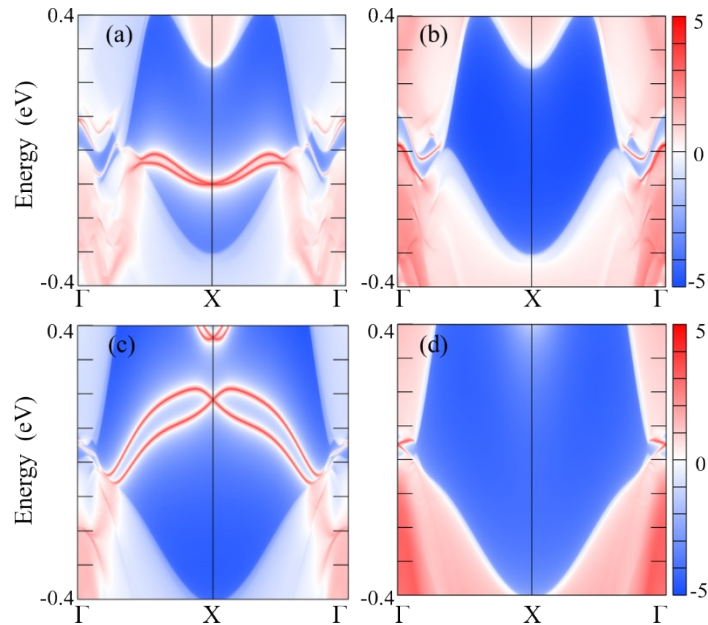

Fig. S8. Topological left (a) and right (b) edge states for  $\text{In}_2\text{Te}_2\text{S}$  monolayer under  $P\uparrow$  state at  $E = -0.1 \text{ V/\AA}$ . Topological left (c) and right (d) edge states for  $\text{In}_2\text{Te}_2\text{S}$  monolayer under  $P\uparrow$  state at  $E = 0.1 \text{ V/\AA}$ .

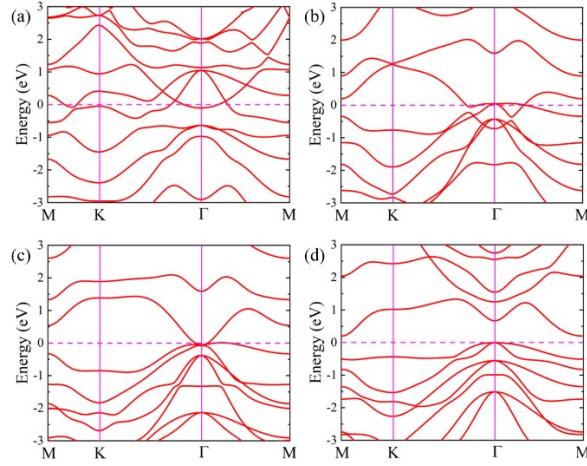

Fig. S9. Band structure of  $\text{In}_2\text{Te}_2\text{S}$  monolayer under different electric field. (a)  $-0.5 \text{ V}/\text{\AA}$ ; (b)  $-0.1 \text{ V}/\text{\AA}$ ; (c)  $0.1 \text{ V}/\text{\AA}$ ; (d)  $0.5 \text{ V}/\text{\AA}$ .

Table SI. The calculated lattice parameters for  $\text{In}_2\text{Te}_2\text{S}$  and  $\text{In}_2\text{Te}_3$  monolayers. The 1, 2, 3, 4, and 5 represent the S (Te), In, Te, In, and Te atoms.

|                                        | $a$ ( $\text{\AA}$ ) | $b$ ( $\text{\AA}$ ) | 1-2   | 2-3   | 3-4   | 4-5   |
|----------------------------------------|----------------------|----------------------|-------|-------|-------|-------|
| $\text{In}_2\text{Te}_2\text{S}$ -up   | 4.227                | 7.187                | 2.682 | 3.068 | 2.750 | 2.847 |
| $\text{In}_2\text{Te}_2\text{S}$ -down | 4.224                | 7.182                | 2.626 | 2.795 | 3.056 | 2.901 |
| $\text{In}_2\text{Te}_3$ -up           | 4.406                | 7.403                | 2.938 | 3.112 | 2.767 | 2.890 |
| $\text{In}_2\text{Te}_3$ -down         | 4.406                | 7.403                | 2.890 | 2.767 | 3.112 | 2.938 |

Table SII. The calculated charge for different atom with Bader method.

|                                        | Te    | In    | Te    | In    | S     |
|----------------------------------------|-------|-------|-------|-------|-------|
| $\text{In}_2\text{Te}_2\text{S}$ -up   | 6.405 | 2.288 | 6.486 | 2.071 | 6.750 |
| $\text{In}_2\text{Te}_2\text{S}$ -down | 6.443 | 2.371 | 6.477 | 2.000 | 6.707 |
| $\text{In}_2\text{Te}_3$ -up           | 6.413 | 2.368 | 6.480 | 2.284 | 6.453 |
| $\text{In}_2\text{Te}_3$ -down         | 6.453 | 2.284 | 6.480 | 2.368 | 6.413 |
